# Supplementary material
Source: PubMed Central journal article supplement (PMC7702287)
Supplement: 93088-2020.08.13.20147595-1.pdf [file 93088-2020.08.13.20147595-1.pdf]

## **Online Supplement**

The operational impact of deploying SARS-CoV-2 vaccines in countries of the WHO African Region

**Supplemental Table 1. Routine and SARS-CoV-2 vaccines, schedules, and cold storage volume per dose**

|                                                                                      | Schedule <sup>1</sup>     | Cold storage tertiary packaging volume per dose (mL) <sup>2,3</sup> | Cold storage secondary packaging volume per dose (mL) <sup>2,3</sup> |
|--------------------------------------------------------------------------------------|---------------------------|---------------------------------------------------------------------|----------------------------------------------------------------------|
| Routine infant immunization                                                          |                           |                                                                     |                                                                      |
| Bacille Calmette-Guerin                                                              | Birth dose                | 3.6                                                                 | 1.3                                                                  |
| Diphtheria-tetanus-pertussis-hepatitis B-Haemophilus influenzae type b (pentavalent) | 6, 10 and 14 weeks        | 51.3                                                                | 4.0                                                                  |
| Polio (Inactivated)                                                                  | 6, 10 and 14 weeks        | 71.4                                                                | 4.4                                                                  |
| Pneumococcal (Conjugate)                                                             | 6, 10 and 14 weeks        | 40.1                                                                | 3.5                                                                  |
| Rotavirus                                                                            | 6 and 10 weeks            | 34.7                                                                | 7.4                                                                  |
| Measles-rubella                                                                      | 9-12 months, 13-24 months | 26.2                                                                | 3.0                                                                  |
| Tetanus-diphtheria                                                                   | 13-24 months              | 11.0                                                                | 2.3                                                                  |
| Meningococcal A (Conjugate)                                                          | 13-24 months              | 14.6                                                                | 2.1                                                                  |
| Yellow fever                                                                         | 13-24 months              | 5.0                                                                 | 2.9                                                                  |
| Routine children immunization                                                        |                           |                                                                     |                                                                      |
| HPV <sup>4</sup> (girls only)                                                        | 2 doses from 9-14 years   | 7.6                                                                 | 5.7                                                                  |
| Tetanus-diphtheria                                                                   | 9-14 years                | 11.0                                                                | 2.3                                                                  |
| SARS-CoV-2 immunization targeting risk groups                                        |                           |                                                                     |                                                                      |
| ≥65 years                                                                            | 2 doses, 1 month apart    | 12.9                                                                | 5.2                                                                  |
| Healthcare workers                                                                   | 2 doses, 1 month apart    | 12.9                                                                | 5.2                                                                  |
| Chronic diseases                                                                     | 2 doses, 1 month apart    | 12.9                                                                | 5.2                                                                  |

Notes:

1. Vaccines and schedules are from WHO Immunization Tables except SARS-CoV-2 vaccines.<sup>1</sup>
2. Tertiary and secondary packaging volumes per dose from WHO Prequalified Vaccines Database with the exception of SARS-CoV-2 vaccines.<sup>2</sup> All data presented for multidose formulations.
3. SARS-CoV-2 cold storage volume per dose use prequalified multidose vial influenza vaccines as a proxy.
4. HPV vaccination programs generally target girls only aged 9 through 14 years.<sup>1</sup> For this simulation, we assumed the full HPV immunization series was given to girls 9 years of age.

**Supplemental Table 2. Study assumptions**

|                                | <b>Routine immunization assumption</b>                                                                                                                                                                                                          | <b>SARS-CoV-2 immunization assumption</b>                                                             | <b>Comments</b>                                                                                                                                                                                                                                                                                                                                                                                                                                                                             |
|--------------------------------|-------------------------------------------------------------------------------------------------------------------------------------------------------------------------------------------------------------------------------------------------|-------------------------------------------------------------------------------------------------------|---------------------------------------------------------------------------------------------------------------------------------------------------------------------------------------------------------------------------------------------------------------------------------------------------------------------------------------------------------------------------------------------------------------------------------------------------------------------------------------------|
| <b>Vaccines</b>                | WHO prequalified vaccines in multidose vial presentation given per WHO recommended schedule. <sup>14</sup>                                                                                                                                      | SARS-CoV-2 vaccine in multidose vial presentation given in a two vaccination series, one month apart. | Given that there are no licensed SARS-CoV-2 vaccines, dose assumptions rely on dose schedule of SARS-CoV-2 vaccine clinical trials in the United States to date, and the volume analyses use total tertiary packaging volume per dose of WHO prequalified influenza vaccines as a proxy.                                                                                                                                                                                                    |
| <b>Packaging</b>               | Tertiary packaging at the national level<br>Secondary packaging at all subnational levels                                                                                                                                                       | Tertiary packaging at national level<br>Secondary packaging at all subnational levels                 | National level vaccine volume analyses use total tertiary packaging volume required per dose (the unit for international transport), defined as the volume of the container holding cartons which contain vaccine vials divided by the total doses contained.<br>Subnational levels vaccine volume analysis use total secondary packaging volume required per dose, defined as the volume of cartons which contain vaccine vials divided by the total doses contained.                      |
| <b>Storage Temperature</b>     | 2° to 8°C                                                                                                                                                                                                                                       | 2° to 8°C                                                                                             |                                                                                                                                                                                                                                                                                                                                                                                                                                                                                             |
| <b>Coverage</b>                | 90% of target group                                                                                                                                                                                                                             | 90% of target group                                                                                   |                                                                                                                                                                                                                                                                                                                                                                                                                                                                                             |
| <b>Target groups</b>           | WHO recommended ages                                                                                                                                                                                                                            | Chronic diseases (any age)<br>Persons ≥ 65 years<br>Healthcare workers                                | Adults with chronic disease and older adults are at increased risk for severe SARS-CoV-2 disease. <sup>3</sup> Health care workers are at increased risk for SARS-CoV-2 infection and disease. <sup>3</sup>                                                                                                                                                                                                                                                                                 |
| <b>Strategy</b>                | Year round                                                                                                                                                                                                                                      | Four month mass vaccination campaign                                                                  | Once pandemic vaccines are available, there will be an imperative to deliver them expeditiously.                                                                                                                                                                                                                                                                                                                                                                                            |
| <b>Wastage multidose vials</b> | 25%                                                                                                                                                                                                                                             | 7.5%                                                                                                  | Vaccine wastage is the doses that are lost or unused. Routine immunization inputs are from WHO guidance while SARS-CoV-2 inputs are from WHO Vaccine Wastage Rates Calculator assuming African Region, four weeks of retention of vaccine after vial opened, 2 dose schedule, 90% coverage, daily immunization sessions, and influenza vaccine. <sup>4</sup>                                                                                                                                |
| <b>Reserve stock</b>           | 3 months at national level<br>1 month at district and regional levels<br>0.5 months at health facility level                                                                                                                                    | No reserve stock                                                                                      | Vaccine reserve stock are the excess supply in case of increased demand or stock-outs. Routine inputs are from WHO guidance while SARS-CoV-2 inputs assume high global demand and limited supply. <sup>5-7</sup>                                                                                                                                                                                                                                                                            |
| <b>Resupply intervals</b>      | 3 months at national, district, and regional levels<br>1 month at health facility level                                                                                                                                                         | Every month                                                                                           | Three month supply interval is common for routine immunization in low resource settings, <sup>8</sup> while SARS-CoV-2 supply interval assumes high global demand and limited supply.                                                                                                                                                                                                                                                                                                       |
| <b>Vaccinators</b>             | Nurse density per capita for WHO African Region countries multiplied by the simulated country population, the proportion of nurses providing immunization services, and estimates of absenteeism at baseline and during the SARS-CoV-2 pandemic | Same as for routine                                                                                   | Typically, persons delivering vaccines in the region are nurses, but not all nurses engage in the provision of immunization services. The estimates for nurses per capita are from WHO. <sup>9</sup> Estimates of percentage of nurses providing immunization services are from the Organisation for Economic Co-operation and Development. <sup>10</sup> Absenteeism estimates from observational data (baseline) and modelling data (SARS-CoV-2) from the United States. <sup>11,12</sup> |

**Supplemental Table 3. African Region routine immunization programs as of 2017<sup>a</sup>**

| Country <sup>b</sup>                 | MCV2  | PCV   | Rota  | HPV   | Rubella | Tetanus <sup>b</sup><br>age 2 | Tetanus <sup>b</sup><br>adolescent | MenA  | YF    | BCG   |
|--------------------------------------|-------|-------|-------|-------|---------|-------------------------------|------------------------------------|-------|-------|-------|
| 1. Algeria                           | Y     | Y     | N     | N     | Y       | N                             | Y                                  | N     | N     | Y     |
| 2. Angola                            | Y     | Y     | Y     | N     | N       | N                             | N                                  | N     | Y     | Y     |
| 3. Benin                             | N     | Y     | N     | N     | N       | N                             | N                                  | N     | Y     | Y     |
| 4. Botswana                          | Y     | Y     | Y     | Y     | Y       | Y                             | N                                  | N     | N     | Y     |
| 5. Burkina Faso                      | Y     | Y     | Y     | N     | Y       | N                             | N                                  | Y     | Y     | Y     |
| 6. Burundi                           | Y     | Y     | Y     | N     | Y       | Y                             | N                                  | N     | N     | Y     |
| 7. Cabo Verde                        | Y     | N     | N     | N     | Y       | N                             | N                                  | N     | N     | Y     |
| 8. Cameroon                          | N     | Y     | Y     | N     | Y       | N                             | N                                  | N     | Y     | Y     |
| 9. Central African Republic          | N     | Y     | N     | N     | N       | N                             | N                                  | Y     | Y     | Y     |
| 10. Chad                             | N     | N     | N     | N     | N       | N                             | N                                  | Y     | Y     | Y     |
| 11. Comoros                          | N     | N     | N     | N     | N       | N                             | N                                  | N     | N     | Y     |
| 12. Congo                            | N     | Y     | Y     | N     | N       | N                             | N                                  | N     | Y     | Y     |
| 13. Côte d'Ivoire                    | N     | Y     | Y     | N     | N       | N                             | N                                  | N     | Y     | Y     |
| 14. Democratic Republic of the Congo | N     | Y     | N     | N     | N       | N                             | N                                  | N     | Y     | Y     |
| 15. Equatorial Guinea                | N     | N     | N     | N     | N       | N                             | N                                  | N     | Y     | Y     |
| 16. Eritrea                          | Y     | Y     | Y     | N     | Y       | N                             | N                                  | N     | N     | Y     |
| 17. Eswatini                         | Y     | Y     | Y     | N     | Y       | N                             | N                                  | N     | N     | Y     |
| 18. Ethiopia                         | N     | Y     | Y     | N     | N       | N                             | N                                  | N     | N     | Y     |
| 19. Gabon                            | N     | N     | N     | N     | N       | N                             | N                                  | N     | Y     | Y     |
| 20. Gambia                           | Y     | Y     | Y     | N     | Y       | Y                             | N                                  | N     | Y     | Y     |
| 21. Ghana                            | Y     | Y     | Y     | N     | Y       | N                             | N                                  | Y     | Y     | Y     |
| 22. Guinea                           | N     | N     | N     | Y     | N       | N                             | N                                  | N     | Y     | Y     |
| 23. Guinea-Bissau                    | N     | Y     | Y     | N     | N       | N                             | N                                  | N     | Y     | Y     |
| 24. Kenya                            | Y     | Y     | Y     | N     | Y       | N                             | N                                  | N     | N     | Y     |
| 25. Lesotho                          | Y     | Y     | Y     | N     | Y       | Y                             | N                                  | N     | N     | Y     |
| 26. Liberia                          | N     | Y     | Y     | N     | N       | N                             | N                                  | N     | Y     | Y     |
| 27. Madagascar                       | N     | Y     | Y     | N     | N       | N                             | N                                  | N     | N     | Y     |
| 28. Malawi                           | Y     | Y     | Y     | N     | Y       | N                             | N                                  | N     | N     | Y     |
| 29. Mali                             | N     | Y     | Y     | N     | N       | N                             | N                                  | Y     | Y     | Y     |
| 30. Mauritania                       | N     | Y     | Y     | N     | N       | N                             | N                                  | N     | N     | Y     |
| 31. Mauritius                        | Y     | Y     | Y     | Y     | Y       | Y                             | N                                  | N     | N     | N     |
| 32. Mozambique                       | Y     | Y     | Y     | Y     | N       | N                             | N                                  | N     | N     | Y     |
| 33. Namibia                          | Y     | Y     | Y     | N     | Y       | N                             | Y                                  | N     | N     | Y     |
| 34. Niger                            | Y     | Y     | Y     | N     | N       | N                             | N                                  | Y     | Y     | Y     |
| 35. Nigeria                          | N     | Y     | N     | N     | N       | N                             | N                                  | N     | Y     | Y     |
| 36. Rwanda                           | Y     | Y     | Y     | Y     | Y       | N                             | N                                  | N     | N     | Y     |
| 37. Sao Tome and Principe            | Y     | Y     | Y     | Y     | Y       | N                             | N                                  | N     | Y     | Y     |
| 38. Senegal                          | Y     | Y     | Y     | N     | Y       | N                             | N                                  | N     | Y     | Y     |
| 39. Seychelles                       | Y     | N     | Y     | Y     | Y       | Y                             | N                                  | N     | N     | Y     |
| 40. Sierra Leone                     | Y     | Y     | Y     | N     | N       | N                             | N                                  | N     | Y     | Y     |
| 41. South Africa                     | Y     | Y     | Y     | Y     | N       | N                             | Y                                  | N     | N     | Y     |
| 42. South Sudan                      | N     | N     | N     | N     | N       | N                             | N                                  | N     | N     | Y     |
| 43. Togo                             | N     | Y     | Y     | N     | N       | N                             | N                                  | N     | Y     | Y     |
| 44. Uganda                           | N     | Y     | N     | Y     | N       | N                             | N                                  | N     | N     | Y     |
| 45. Tanzania                         | Y     | Y     | Y     | N     | Y       | N                             | N                                  | N     | N     | Y     |
| 46. Zambia                           | Y     | Y     | Y     | N     | Y       | N                             | N                                  | N     | N     | Y     |
| 47. Zimbabwe                         | Y     | Y     | Y     | Y     | Y       | Y                             | N                                  | N     | N     | Y     |
| Total                                | 26    | 39    | 34    | 10    | 22      | 7                             | 3                                  | 6     | 23    | 46    |
| %                                    | 55.3% | 83.0% | 72.3% | 21.3% | 46.8%   | 14.9%                         | 6.4%                               | 12.7% | 48.9% | 97.9% |

Notes:

- a. Tetanus-containing vaccines given at time periods noted. Some more common routine vaccines were excluded from this table, including diphtheria-tetanus-pertussis, hepatitis B, and *Haemophilus influenzae* type b vaccines. Abbreviations: MCV2=second dose of measles-containing vaccine, PCV=pneumococcal conjugate vaccine, Rota=rotavirus vaccine, HPV=human papillomavirus vaccine, MenA= Neisseria meningitidis group A vaccine, YF= yellow fever vaccine, BCG= bacille Calmette-Guérin vaccine
- b. Data are from 47 African Region countries reporting 2017 data to the WHO UNICEF Joint Reporting Form (JRF) on Immunization.<sup>13</sup>.

**Supplemental Table 4. Vaccine doses and doses per vaccinator for routine and SARS-CoV-2 vaccination programs by time period by nurse density estimate for WHO Regions**

| Source of nurse density input                         | Nurse density per 10,000 population <sup>a</sup> | Routine doses / vaccinator <sup>c</sup> (baseline) | Routine doses / vaccinator (during pandemic) | ≥65 years (SARS-CoV-2) |                                          | Chronic diseases (SARS-CoV-2) |                                          | HCWs (SARS-CoV-2)  |                                          | All risk groups combined (SARS-CoV-2) |                                          | Comparative workload between regions<br><br>% WHO Regional Office divided by simulated country SARS-CoV-2 vaccine doses / vaccinator <sup>d</sup> |
|-------------------------------------------------------|--------------------------------------------------|----------------------------------------------------|----------------------------------------------|------------------------|------------------------------------------|-------------------------------|------------------------------------------|--------------------|------------------------------------------|---------------------------------------|------------------------------------------|---------------------------------------------------------------------------------------------------------------------------------------------------|
|                                                       |                                                  |                                                    |                                              | Doses / vaccinator     | % of baseline routine for African Region | Doses / vaccinator            | % of baseline routine for African Region | Doses / vaccinator | % of baseline routine for African Region | Doses / vaccinator                    | % of baseline routine for African Region |                                                                                                                                                   |
| African Region Country                                | 6.9                                              | 160.1                                              | 174.1                                        | 52.0                   | 32.5%                                    | 176.7                         | 110.4%                                   | 2.2                | 1.4%                                     | 199.9                                 | 124.8%                                   | --                                                                                                                                                |
| Comparison using nurse density from other WHO Regions |                                                  |                                                    |                                              |                        |                                          |                               |                                          |                    |                                          |                                       |                                          |                                                                                                                                                   |
| Americas                                              | 25.7                                             | 43.0                                               | 46.7                                         | 14.0                   | 8.7%                                     | 47.4                          | 29.6%                                    | 0.6                | 0.4%                                     | 53.7                                  | 33.5%                                    | 26.8%                                                                                                                                             |
| Eastern Mediterranean                                 | 18.9                                             | 58.5                                               | 63.5                                         | 19.0                   | 11.9%                                    | 64.5                          | 40.3%                                    | 0.8                | 0.5%                                     | 73.0                                  | 45.6%                                    | 36.5%                                                                                                                                             |
| Europe                                                | 66.5                                             | 16.6                                               | 18.1                                         | 5.4                    | 3.4%                                     | 18.3                          | 11.5%                                    | 0.2                | 0.1%                                     | 20.7                                  | 13.0%                                    | 10.4%                                                                                                                                             |
| South-East Asia                                       | 16.4                                             | 67.4                                               | 73.2                                         | 21.9                   | 13.7%                                    | 74.4                          | 46.4%                                    | 0.9                | 0.6%                                     | 84.1                                  | 52.5%                                    | 42.1%                                                                                                                                             |
| Western Pacific                                       | 34.9                                             | 31.7                                               | 34.4                                         | 10.3                   | 6.4%                                     | 34.9                          | 21.8%                                    | 0.4                | 0.3%                                     | 39.5                                  | 24.7%                                    | 19.8%                                                                                                                                             |
| Global                                                | 28.5                                             | 38.8                                               | 42.1                                         | 12.6                   | 7.9%                                     | 42.8                          | 26.7%                                    | 0.5                | 0.3%                                     | 48.4                                  | 30.2%                                    | 24.2%                                                                                                                                             |

Notes:

- Nurse density data are from WHO Global Health Workforce Statistics. We used the median value from countries per WHO Region at the most recent available date and divided by country population estimates to calculate per capita values.<sup>9,14</sup>
- Total vaccinators is the nurse density multiplied by the simulated country population (20,000,000) x 43% (the estimated percentage of nurses that provide immunization services).<sup>9,10</sup>
- Adjustments account for 3% absenteeism (baseline) and an additional 8% absenteeism (during pandemic).<sup>11,12</sup>
- The relationship of SARS-CoV-2 vaccine workload between the estimates for the simulated country using African Region versus other WHO Regional Office nurse density estimates is the same regardless of target group.

**Supplemental Figure 1. National level monthly volumes stored for routine and SARS-CoV-2 risk group vaccination**

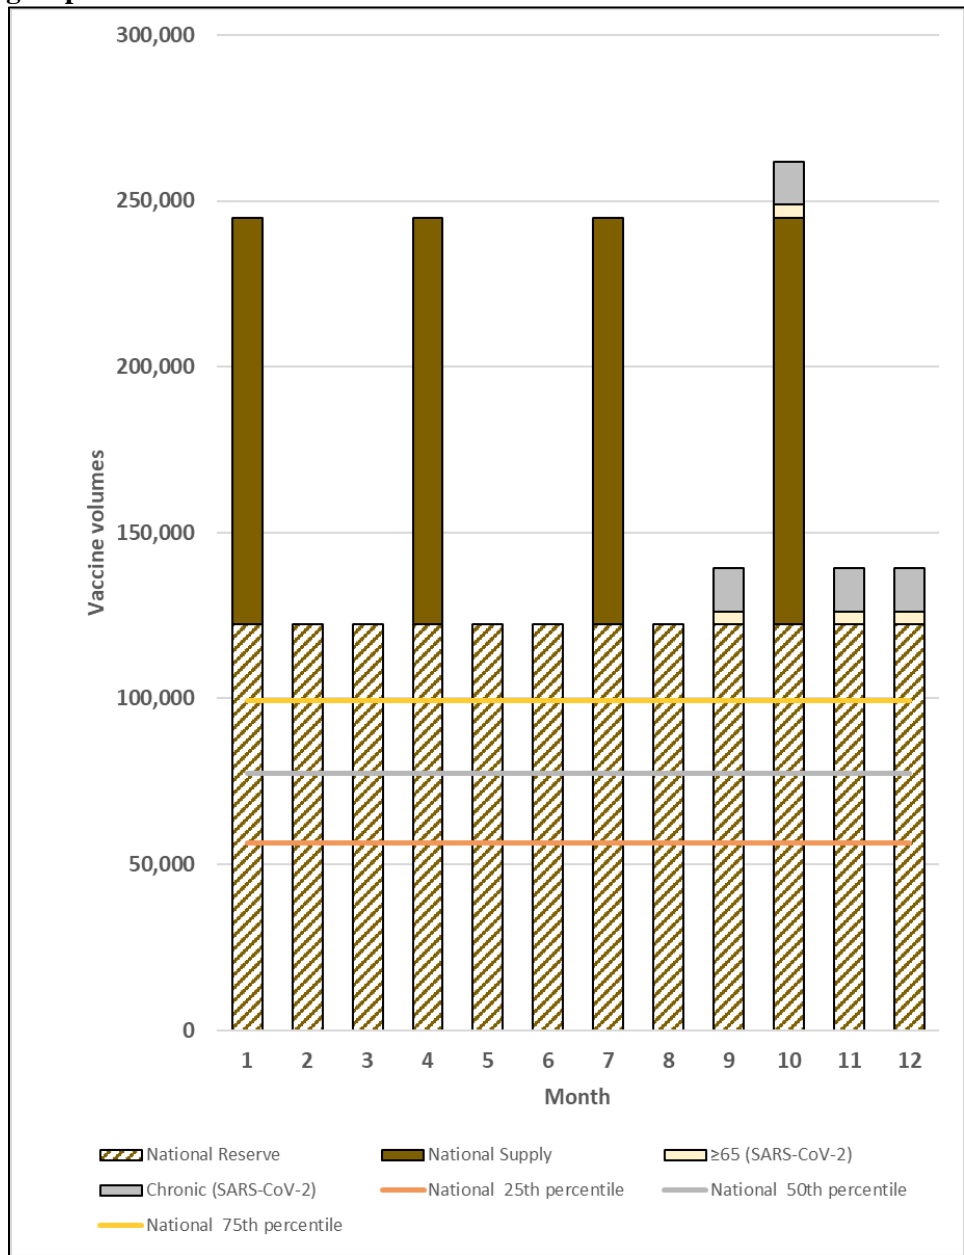

Notes:

1. Figure depicts total national level vaccine volumes calculated according to study assumptions and the vaccine flow down schematic (Figure 1).
2. The highest volume month (month 10) was chosen for the maximum national level monthly analyses.
3. HCWs target group removed because volume contribution was too small to depict in the figure.
4. Upper and lower range capacity excluded from this figure

**Supplemental Figure 2. Subnational level monthly volumes stored for routine and SARS-CoV-2 risk group vaccination**

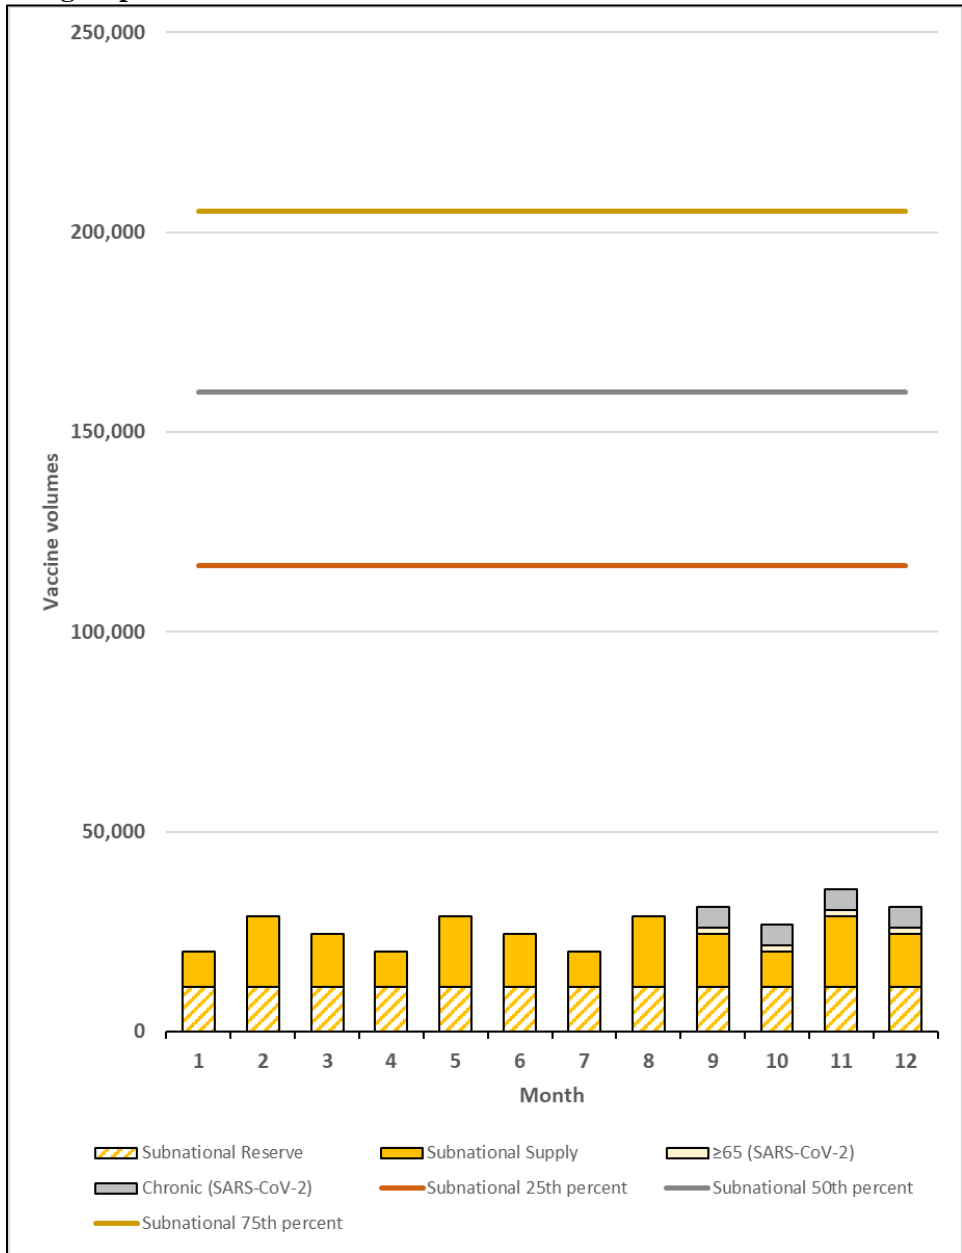

Notes:

1. Figure depicts total national level vaccine volumes calculated according to study assumptions and the vaccine flow down schematic (Figure 1).
2. The highest volume month (month 11) was chosen for the maximum national level monthly analyses.
3. HCWs target group removed because volume contribution was too small to depict in the figure.
4. Upper and lower range capacity excluded from this figure

## SUPPLEMENT REFERENCES

1. World Health Organization. Table 1: Summary of WHO Position Papers - Recommendations for Routine Immunization. 2019. [https://www.who.int/immunization/policy/Immunization\\_routine\\_table1.pdf](https://www.who.int/immunization/policy/Immunization_routine_table1.pdf) (accessed December 17, 2019).
2. World Health Organization. WHO Prequalified Vaccines. 2019. [https://extranet.who.int/gavi/PQ\\_Web/](https://extranet.who.int/gavi/PQ_Web/) (accessed March 22, 2019).
3. World Health Organization. A global framework to ensure equitable and fair allocation of COVID-19 products. 2020. [https://apps.who.int/gb/COVID-19/pdf\\_files/18\\_06/Global%20Allocation%20Framework.pdf](https://apps.who.int/gb/COVID-19/pdf_files/18_06/Global%20Allocation%20Framework.pdf) (accessed June 26, 2020).
4. World Health Organization. WHO Vaccine Wastage Rates Calculator. 2020. [https://www.who.int/immunization/programmes\\_systems/supply\\_chain/resources/WHO\\_Vaccine\\_Wastage\\_Rates\\_Calculator\\_Tool.xlsx](https://www.who.int/immunization/programmes_systems/supply_chain/resources/WHO_Vaccine_Wastage_Rates_Calculator_Tool.xlsx) (accessed 25 April 2020).
5. World Health Organization. Vaccine Introduction Guidelines. 2005. [https://www.who.int/immunization/hpv/plan/vaccine\\_introduction\\_guidelines\\_who\\_2005.pdf](https://www.who.int/immunization/hpv/plan/vaccine_introduction_guidelines_who_2005.pdf) (accessed 02 March 2020).
6. World Health Organization. Training for mid-level managers (MLM) module 1: cold chain, vaccines and safe-injection equipment management. 2008. [http://apps.who.int/iris/bitstream/10665/70184/1/WHO\\_IVB\\_08.01\\_eng.pdf](http://apps.who.int/iris/bitstream/10665/70184/1/WHO_IVB_08.01_eng.pdf) (accessed January 4, 2020).
7. World Health Organization. Principles and considerations for adding a vaccine to a national immunization programme: from decision to implementation and monitoring. 2014. <https://apps.who.int/iris/handle/10665/111548> (accessed June 29, 2020).
8. World Health Organization. Guideline for establishing or improving primary and intermediate vaccine stores. 2002. [https://apps.who.int/iris/bitstream/handle/10665/67807/WHO\\_V-B\\_02.34\\_eng.pdf](https://apps.who.int/iris/bitstream/handle/10665/67807/WHO_V-B_02.34_eng.pdf)).
9. World Health Organization. WHO Global Health Workforce Statistics: December 2018 update. 2018. <https://www.who.int/hrh/statistics/hwfstats/en/> (accessed January 22, 2020).
10. International Council of Nurses. The role of nurses in immunisation: a snapshot from oecd countries. 2018. [https://www.icn.ch/sites/default/files/inline-files/IMMUNISATION\\_Report%20%28002%29.pdf](https://www.icn.ch/sites/default/files/inline-files/IMMUNISATION_Report%20%28002%29.pdf) (accessed June 3, 2020).
11. Chin ET, Huynh BQ, Lo NC, Hastie T, Basu S. Healthcare worker absenteeism, child care costs, and COVID-19 school closures: a simulation analysis. *medRxiv* 2020.
12. Ticharwa M, Cope V, Murray M. Nurse absenteeism: An analysis of trends and perceptions of nurse unit managers. *J Nurs Manag* 2019; **27**(1): 109-16.
13. Ortiz JR, Perut M, Dumolard L, et al. A global review of national influenza immunization policies: Analysis of the 2014 WHO/UNICEF Joint Reporting Form on immunization. *Vaccine* 2016; **34**(45): 5400-5.
14. Institute for Health Metrics and Evaluation. Global Burden of Disease Study 2017 (GBD 2017) Population Estimates 1950-2017. 2019. <http://ghdx.healthdata.org/record/ihme-data/gbd-2017-population-estimates-1950-2017> (accessed December 20, 2019).
